# Supplementary material for: MondoA Is Required for Normal Myogenesis and Regulation of the Skeletal Muscle Glycogen Content in Mice
Source: PubMed Central journal article supplement — Diabetes Metab J. 2020 May 18;45(3):439–51. doi: 10.4093/dmj.2019.0212 (PMC8164950; doi:10.4093/dmj.2019.0212), 2020-05-18
Supplement: dmj-2019-0212-s002.pdf [file dmj-2019-0212-s002.pdf]

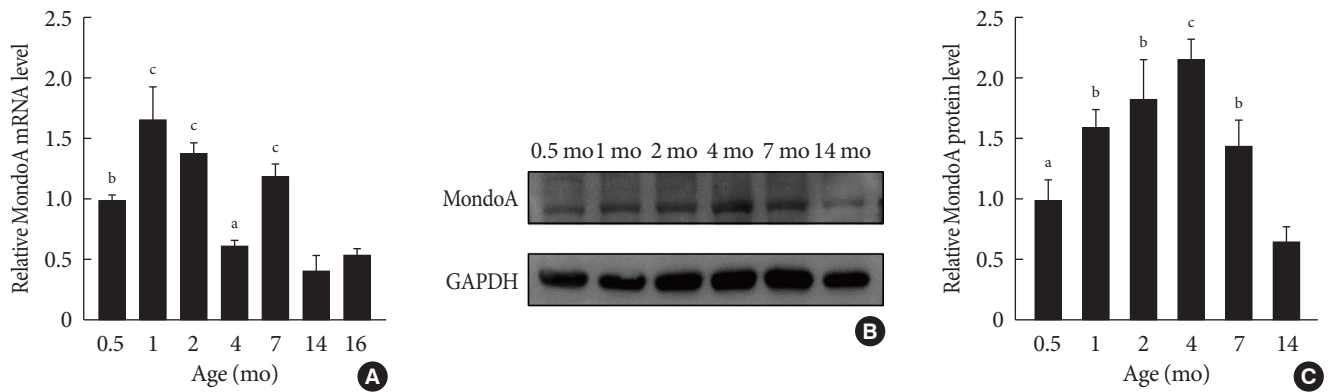

**Supplementary Fig. 2.** (A) Quantitative real-time polymerase chain reaction analysis, (B) Western blotting analysis, and (C) relative protein level of MondoA in skeletal muscle from mice of different ages. GAPDH, glyceraldehyde-3-phosphate dehydrogenase. <sup>a</sup> $P < 0.05$ , <sup>b</sup> $P < 0.01$ , <sup>c</sup> $P < 0.001$ .
