# Supplementary material for: MondoA Is Required for Normal Myogenesis and Regulation of the Skeletal Muscle Glycogen Content in Mice
Source: PubMed Central journal article supplement — Diabetes Metab J. 2020 May 18;45(3):439–51. doi: 10.4093/dmj.2019.0212 (PMC8164950; doi:10.4093/dmj.2019.0212), 2020-05-18
Supplement: dmj-2019-0212-s005.pdf [file dmj-2019-0212-s005.pdf]

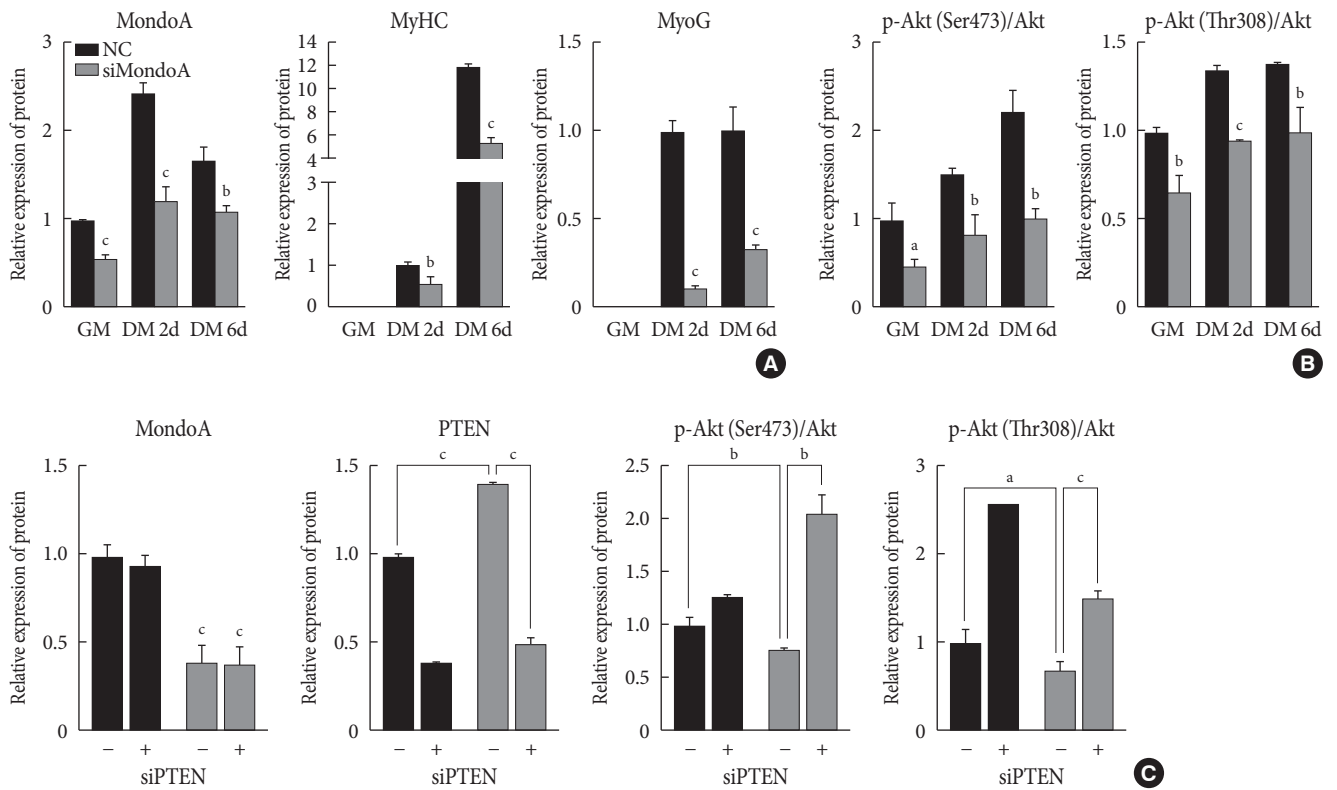

**Supplementary Fig. 5.** (A) Relative protein levels of MondoA, myosin heavy chain (MyHC), and myogenin (MyoG) in C2C12 cells transfected with small interfering RNA against MondoA (siMondoA) or negative control (NC) at 0, 2, and 6-day postdifferentiation. (B) Relative protein levels of key molecules in the phosphoinositide 3-kinase (PI3K)/Akt pathway in C2C12 cells transfected with siMondoA or NC at 0, 2, and 6-day postdifferentiation. (C) Relative protein levels of key molecules in the phosphatase and tensin homolog (PTEN)/PI3K/Akt pathway in C2C12 myoblasts transfected with siMondoA. GM, growth medium; DM, differentiation medium; d, day. <sup>a</sup> $P < 0.05$ , <sup>b</sup> $P < 0.01$ , <sup>c</sup> $P < 0.001$ .
