# Supplementary material for: MondoA Is Required for Normal Myogenesis and Regulation of the Skeletal Muscle Glycogen Content in Mice
Source: PubMed Central journal article supplement — Diabetes Metab J. 2020 May 18;45(3):439–51. doi: 10.4093/dmj.2019.0212 (PMC8164950; doi:10.4093/dmj.2019.0212), 2020-05-18
Supplement: dmj-2019-0212-s006.pdf [file dmj-2019-0212-s006.pdf]

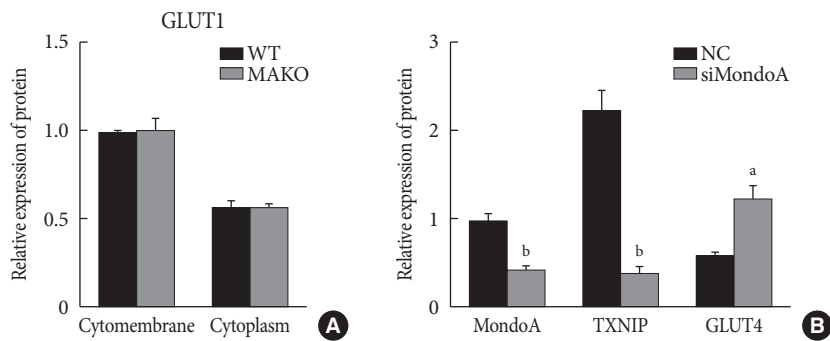

**Supplementary Fig. 6.** (A) Relative protein levels of glucose transporter 1 (GLUT1) in the cell membrane and cytoplasm in the gastrocnemius muscle from wild-type (WT) and MondoA knockout (MAKO) mice. (B) Relative protein levels of MondoA, thioredoxin-interacting protein (TXNIP), and GLUT4 in C2C12 myotubes after transfection of cells with small interfering RNA against MondoA (siMondoA) or negative control (NC). <sup>a</sup> $P < 0.01$ , <sup>b</sup> $P < 0.001$ .
